# Supplementary material
Source: PubMed Central journal article supplement (PMC10357354)
Supplement: jamadermatol-e232162-s001.pdf [file jamadermatol-e232162-s001.pdf]

## Data Sharing Statement

Mastacouris. Incidence and Prevalence of Diagnosed Vitiligo According to Race and Ethnicity, Age, and Sex in the US. *JAMA Dermatol.* Published July 19, 2023.

doi:10.1001/jamadermatol.2023.2162

### Data

**Data available:** Yes

**Data types:** Data dictionary

**How to access data:** [amgarg@northwell.edu](mailto:amgarg@northwell.edu)

**When available:** With publication

### Supporting Documents

**Document types:** Statistical/analytic code

**How to access documents:** [amgarg@northwell.edu](mailto:amgarg@northwell.edu)

**When available:** With publication

### Additional Information

**Who can access the data:** researchers whose proposed use of the data has been approved

**Types of analyses:** specified purpose

**Mechanisms of data availability:** with a signed data access agreement
